# Supplementary material for: The role of surface oxides and stabilising carboxylic acids of copper nanoparticles during low-temperature sintering
Source: Royal Society of Chemistry journal article supplement (doi:10.1039/d1ma01242h), 2022-01-01
Supplement: d1ma01242h1.pdf [file d1ma01242h1.pdf]

Supporting Information

**The role of surface oxides and stabilising carboxylic acids of copper nanoparticles during low-temperature sintering**

Rintaro Tokura,<sup>1</sup> Hiroki Tsukamoto,<sup>1</sup> Tomoharu Tokunaga,<sup>2</sup> Mai Thanh Nguyen,<sup>1</sup> and Tetsu Yonezawa<sup>1,\*</sup>

<sup>1</sup>*Division of Materials Science and Engineering, Faculty of Engineering, Hokkaido University, Kita 13 Nishi 8, Kita-ku, Sapporo, 060-8628, Japan*

<sup>2</sup>*Department of Materials Science and Engineering, Faculty of Engineering, Nagoya University, Furo-cho, Chikusa-ku, Nagoya, Aichi 464-8603, Japan.*

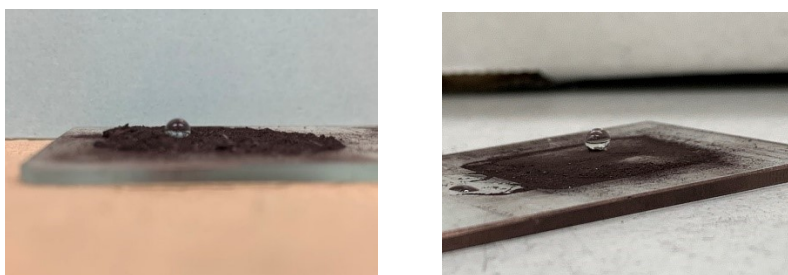

**Figure S1.** Digital images of a water droplet on 1-hexanoic acid-stabilised copper nanoparticles in a powder form. The glass substrate size is 35 mm × 50 mm.

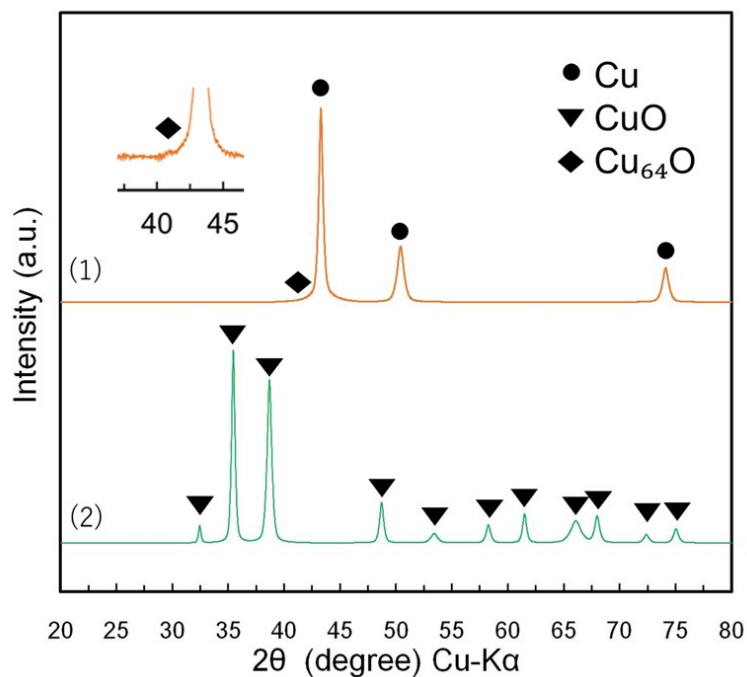

**Figure S2.** X-ray diffraction patterns of (1) Cu nanoparticles after preparation and (2) CuO powders as the precursor of Cu nanoparticles before preparation.

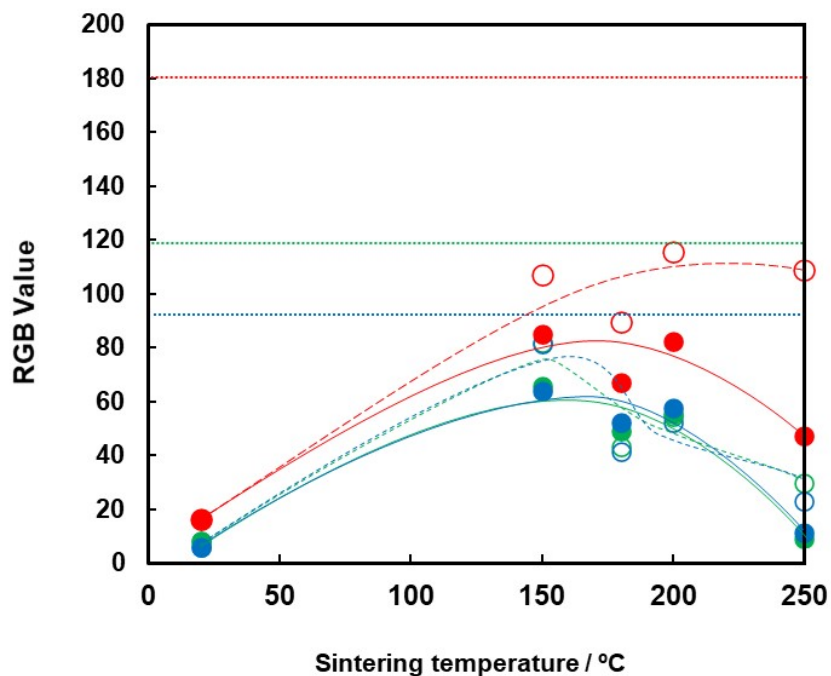

**Figure S3.** RGB values of the digital images of the copper layers sintered at various temperatures. Open circle: sintered under 3%H<sub>2</sub>-N<sub>2</sub> gas flow. Closed circle: sintered under nitrogen gas flow. Red, green and blue correspond to the each colour.

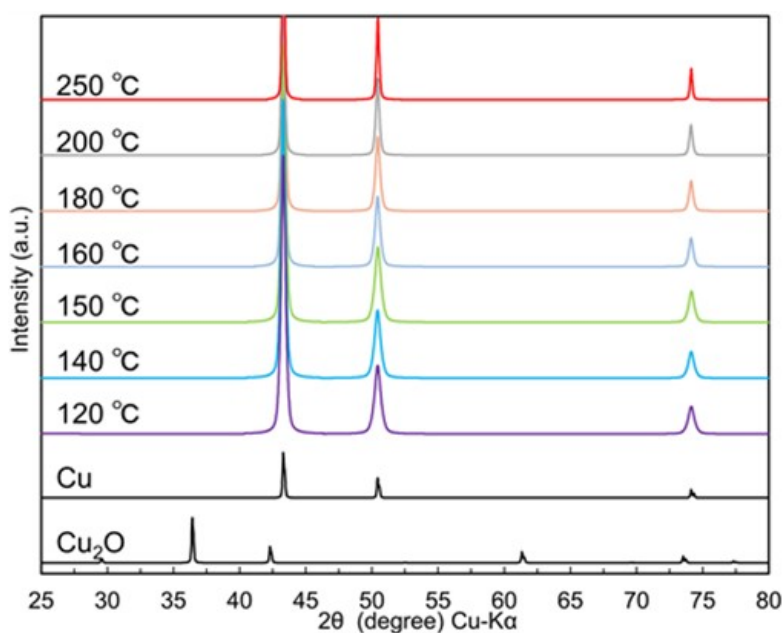

**Figure S4.** X-ray diffraction patterns of the copper layers sintered at various temperatures under 3% $\text{H}_2$ - $\text{N}_2$  mixed gas flow. No peak corresponding to copper oxides can be observed. The peak height is normalised to the height of the Cu (111) peak ( $2\theta = 43.3^\circ$ ).

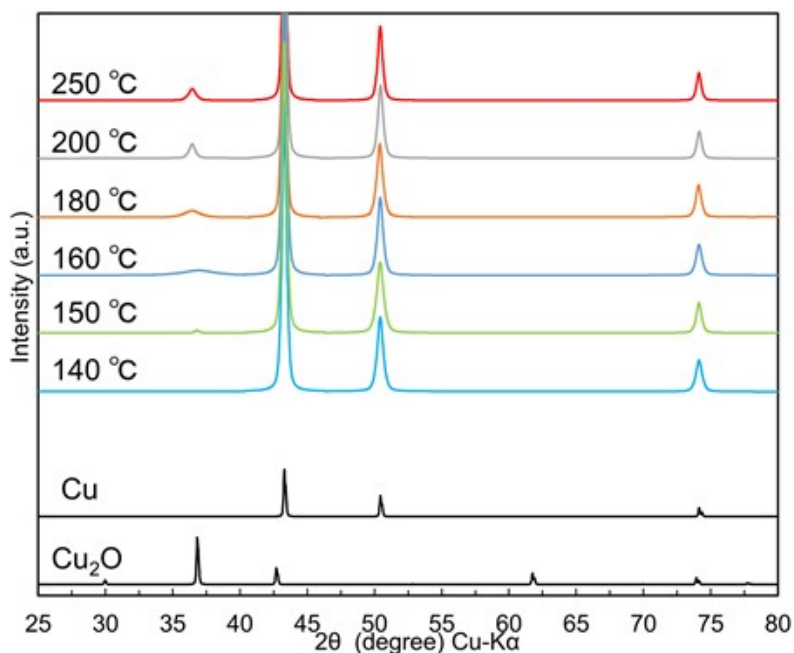

**Figure S5.** X-ray diffraction patterns of the copper layers sintered at various temperatures under nitrogen gas flow. The peaks corresponding to  $\text{Cu}_2\text{O}$  can be observed in the copper layers sintered at temperatures higher than 150 °C. The peak height is normalised to the height of the Cu (111) peak ( $2\theta = 43.3^\circ$ ).

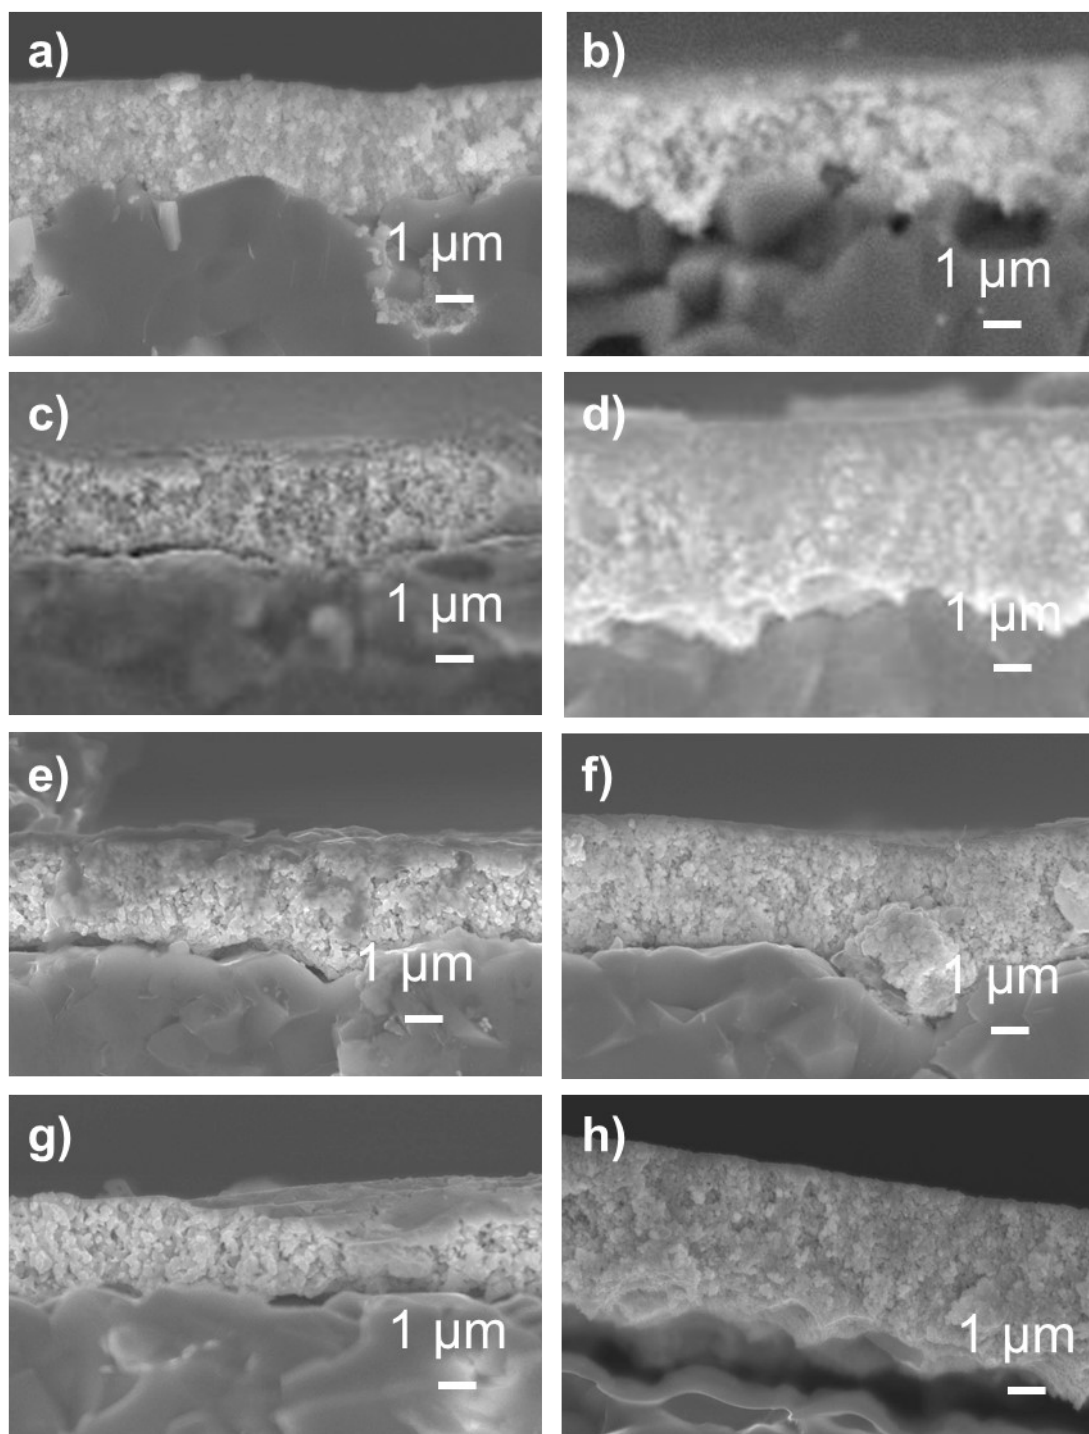

**Figure S6.** Cross-sectional SEM images of the sintered copper nanoparticle layers after sintering at various temperatures. (a,c,e,g) Sintered under 3% $\text{H}_2$ - $\text{N}_2$  mixed gas flow, (b,d,f,h) sintered under nitrogen gas flow. Sintering for 1 h at (a,b) 150 °C, (c,d) 180 °C, (e,f) 200 °C, and (g,h) 250 °C.

**Figure S7.**  
Projection  
of Cu  
(●)  
and  
O  
(○)  
atom  
s of

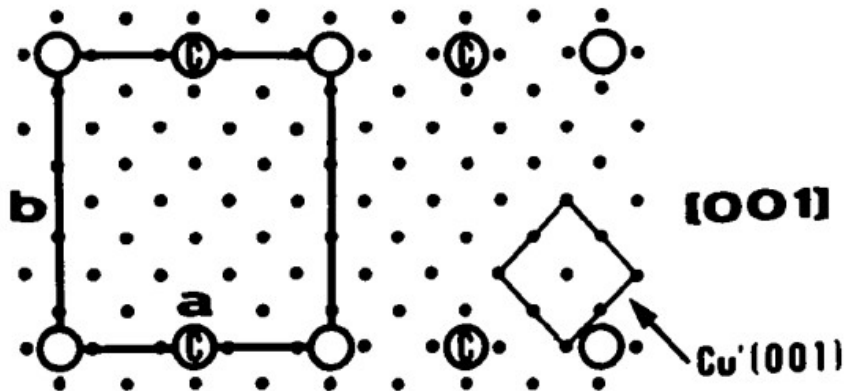

the structure model of  $\text{Cu}_{64}\text{O}$  in  $[001]$ . The unit cell of  $\text{Cu}_{64}\text{O}$  is outlined by thick lines and that of Cu by thin lines. (Reproduced with permission from Reference 33. Copyright 1985 International Union of Crystallography)

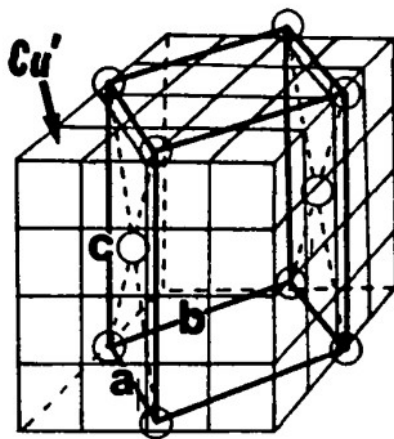

**Figure S8.**  
Orientation  
relationship  
between

the unit cells of  $\text{Cu}_{64}\text{O}$  (thick lines) and Cu (thin lines). ○: Oxygen atom.  $\mathbf{a} = 9.75 \text{ \AA}$ ,  $\mathbf{b} = 10.58 \text{ \AA}$ ,  $\mathbf{c} = 16.2 \text{ \AA}$ . (Reproduced with permission from Reference 33. Copyright 1985 International Union of Crystallography)

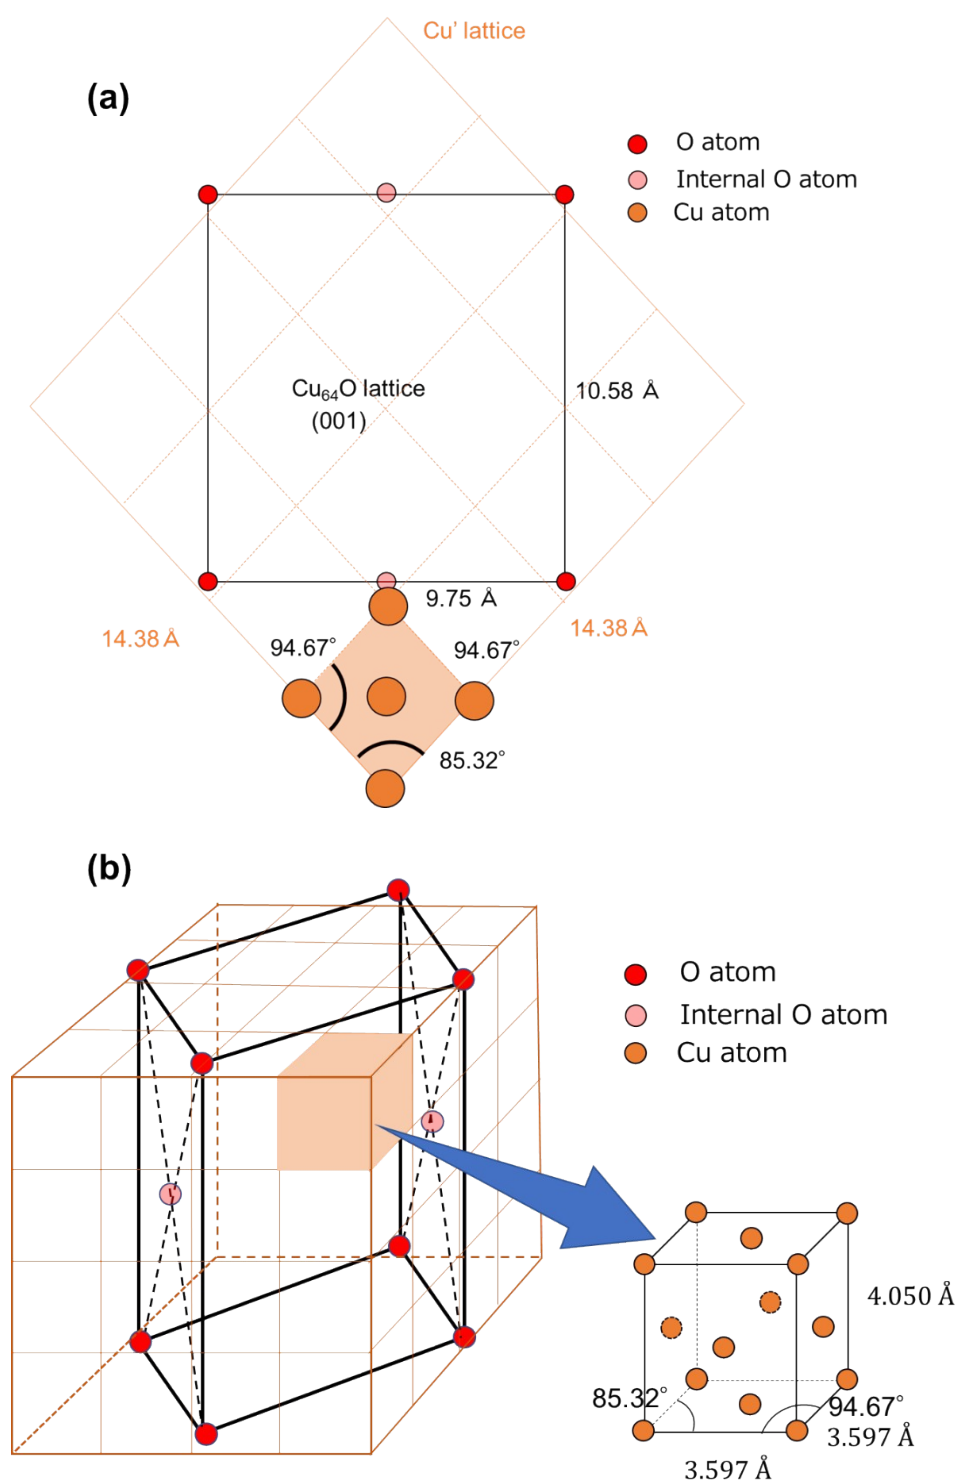

**Figure S9.** (a) Projection of Cu (orange) and O (red and light red) atoms of the structure model of  $\text{Cu}_{64}\text{O}$  in [001]. Copper atoms located at the corner of a rhomb with the length of 3.597 Å and the corner angles of 94.67° and 85.32°. (b) Cell structure of Cu' contains 4 Cu atoms, which can be separated from the  $\text{Cu}_{64}\text{O}$  unit cell. This Cu' cell is illustrated in Figure 13 in the main text.
